# Supplementary material for: Wearable enzyme-free glucose sensor using a flexible sericin-based conductive bio-composite
Source: Royal Society of Chemistry journal article supplement (doi:10.1039/d5sd00188a), 2026-01-01
Supplement: d5sd00188a1.pdf [file d5sd00188a1.pdf]

## Wearable Enzyme-Free Glucose Sensor Using a Flexible Sericin-Based Conductive Bio-composite

Xiaorui Huang <sup>1 #</sup>, Yi Li <sup>1 # \*</sup>, Boxiang Yang <sup>1 #</sup>, Yuxuan Wu <sup>1</sup>, Zhuocheng Jiang <sup>1</sup>, Jiuxi Sui <sup>1</sup>, Siyi Xing <sup>1</sup>, Xue Zhang <sup>1</sup>, Hualin Lan <sup>3</sup>, Hanyan Zou <sup>2 \*</sup>, Yuchan Zhang <sup>1 \*</sup>, Guangchao Zang <sup>1 \*</sup>

1. Biomedical Innovation and Entrepreneurship Practice Base, Lab Teaching & Management Center, Chongqing Medical University, Chongqing, China

2. Instituter for Food and Drug Control, Chongqing, China

3. Chongqing Quality Testing & Inspection Center for Medical Devices, Chongqing, China

#These authors contributed equally to this work.

\*Corresponding authors.

Email address: [liyicqmu@cqmu.edu.cn](mailto:liyicqmu@cqmu.edu.cn) (Yi Li), [zouhanyan@cqifdc.org.cn](mailto:zouhanyan@cqifdc.org.cn) (Hanyan Zou), [zhangyc@cqmu.edu.cn](mailto:zhangyc@cqmu.edu.cn) (Yuchan Zhang), [zangguangchao@cqmu.edu.cn](mailto:zangguangchao@cqmu.edu.cn) (Guangchao Zang)

Figure S1. The swelling rate of SS-DHMC-AuNPs-AMWCNTs film (n=3).

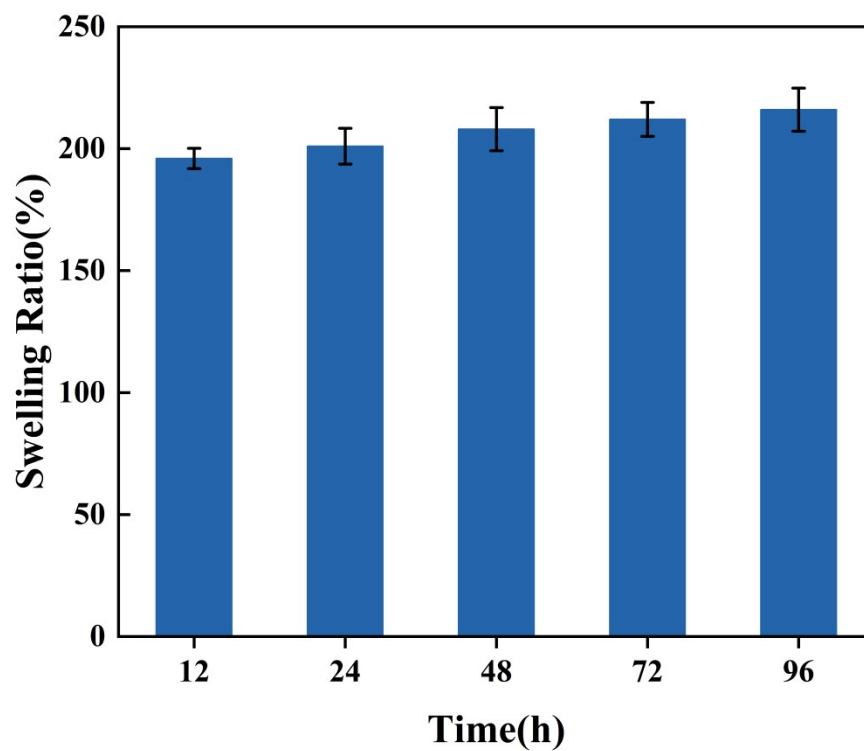

The swelling rate is formulated as:  $(W_x - W_0)/W_0$ .  $W_0$  means initial weight,  $W_x$  means weight after immersion. The composite membrane showed a good swelling rate of 2.15 after immersion in water for 96 hours.

Figure S2. Biocompatibility Evaluation of SS-DHMC-AuNPs-AMWCNTs Patch on Human Skin.

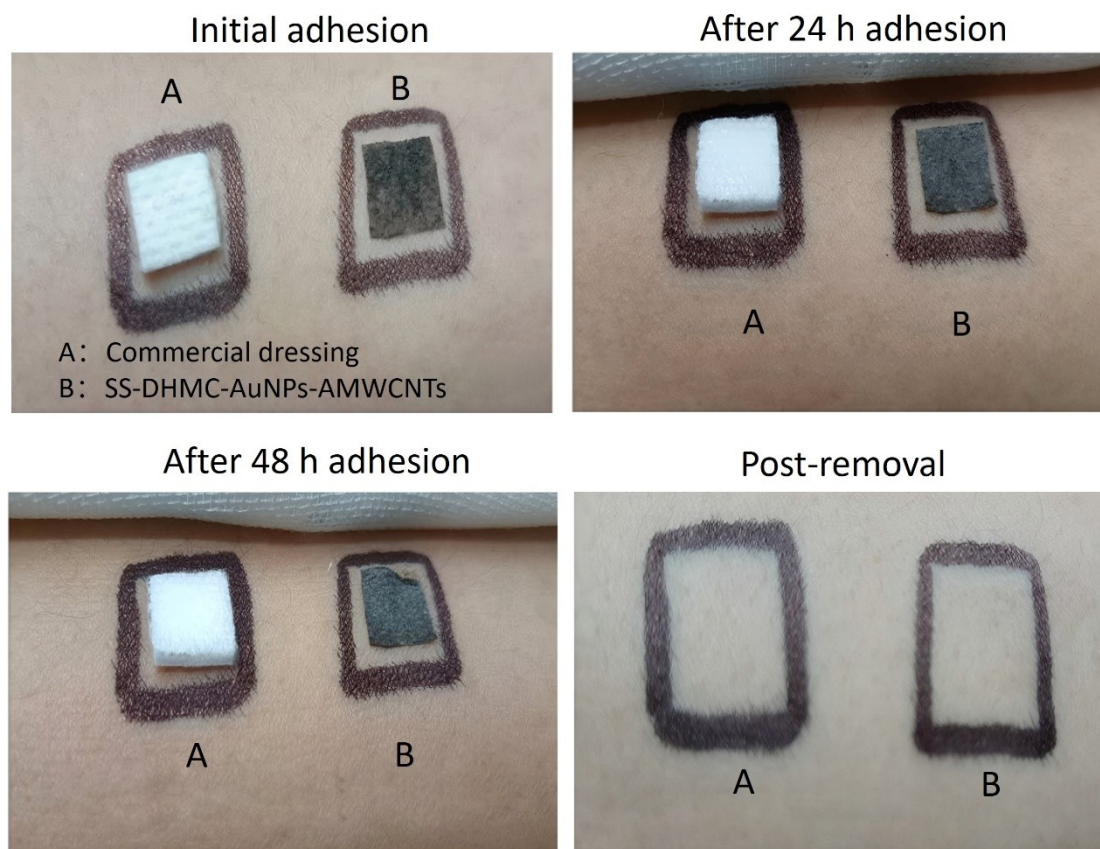

Representative photographs demonstrating biocompatibility of (A) control (commercial dressing) and (B) SS-DHMC-AuNPs-AMWCNTs membrane on human skin at different time points: initial application, after 24 h and 48 h of wear, and immediately after removal. The images reveal that the SS-DHMC-AuNPs-AMWCNTs membrane maintained non-irritating properties throughout the 48-hour wearing period and post-removal, exhibiting comparable performance to the commercial dressing.

Figure S3. Relationship between redox peak currents and glucose concentration for SS-DHMC-AuNPs-AMWCNTs electrode.

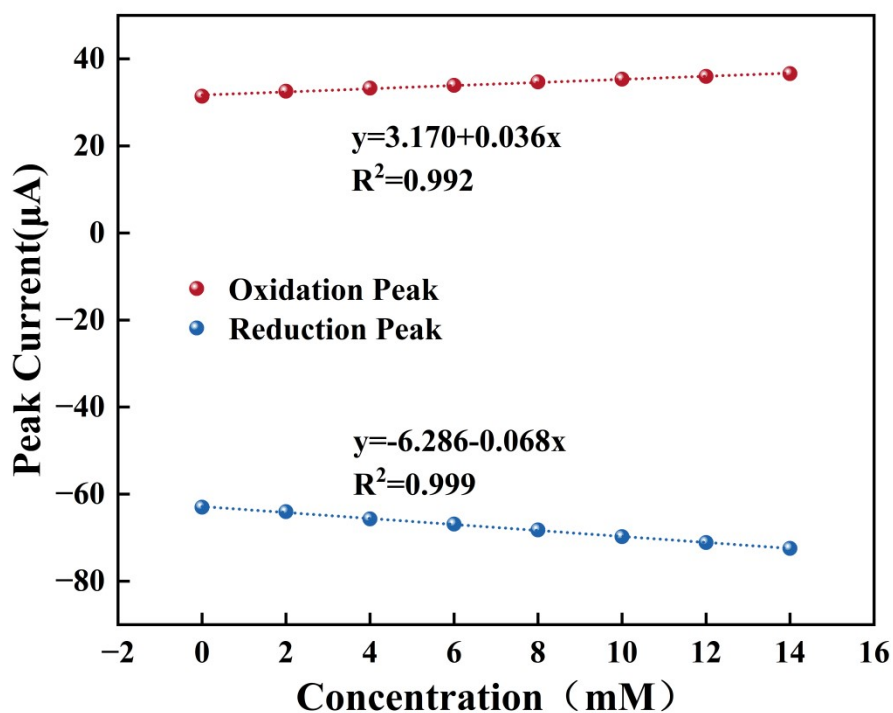

A strong linear correlation was observed between glucose concentration and both the oxidation ( $R^2 = 0.992$ ) and reduction ( $R^2 = 0.999$ ) peak currents of the SS-DHMC-AuNPs-AMWCNTs electrode.

Figure S4. Relationship between redox peak currents and scan rate for SS-DHMC-AuNPs-AMWCNTs electrode.

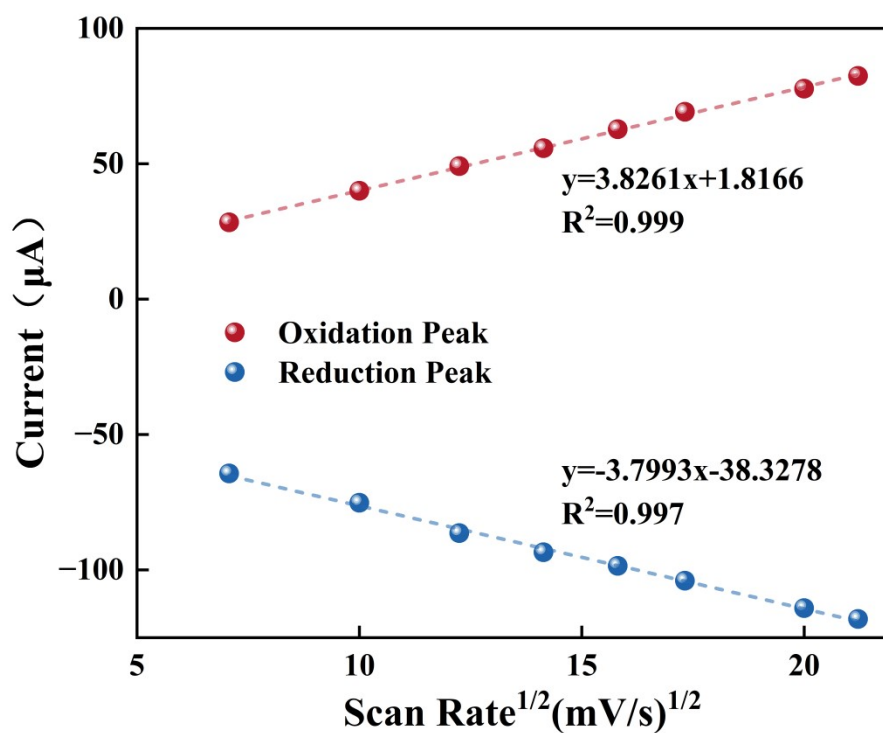

The oxidation ( $R^2 = 0.999$ ) and reduction ( $R^2 = 0.997$ ) peak currents of the SS-DHMC-AuNPs-AMWCNTs electrode demonstrated excellent linear relationships with the square root of the scan rate.

Figure S5. Cyclic Voltammetry Curves of SS-DHMC-AuNPs-AMWCNTs with Varying Contents of Conductive Fillers in PBS (pH 7.0).

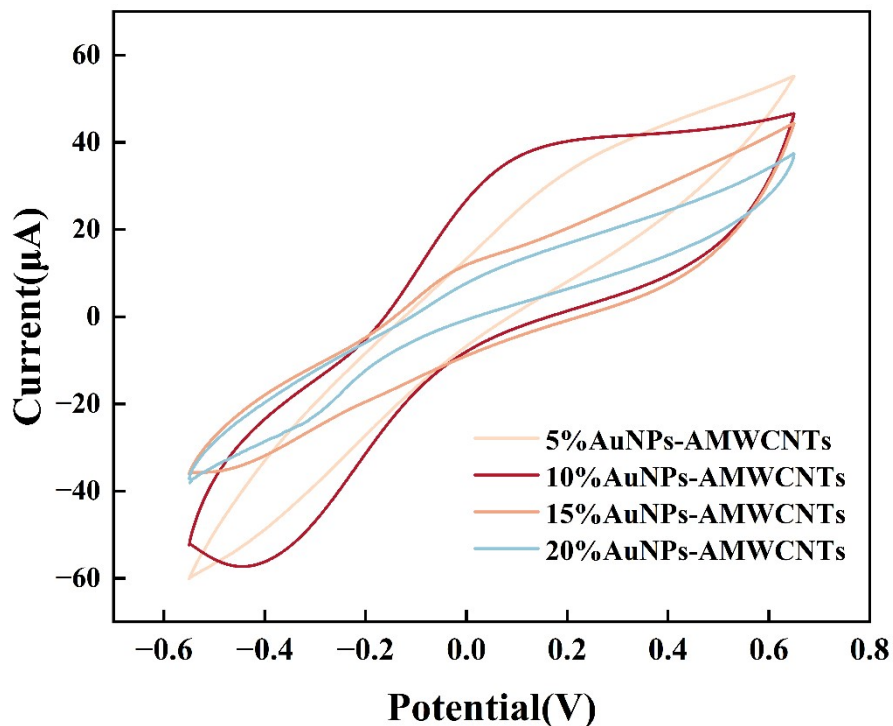

The CV curves demonstrate the electrochemical performance of SS-DHMC-AuNPs-AMWCNTs composites containing 5%, 10%, 15%, and 20% conductive fillers. The sample with 10% conductive filler exhibits the largest CV curve area and the most well-defined redox peaks, indicating superior charge storage capacity and electrochemical activity compared to other compositions.

Figure S6. Correlation analysis between Non-Invasive sweat glucose test results and commercial blood glucose meter measurements.

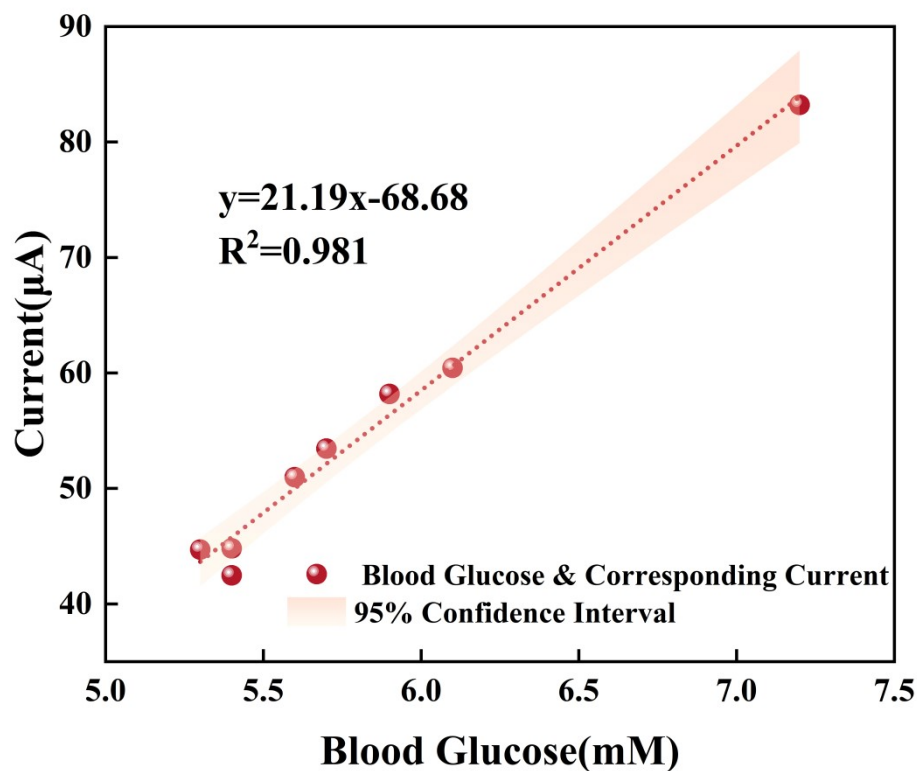

The scatter plot compares the glucose concentrations detected by the sweat sensor (DPV current signal) and a commercial glucometer, with the orange shaded region representing the 95% confidence interval. The two methods exhibit a high degree of agreement, as indicated by the strong linear correlation ( $R^2 = 0.981$ ).

Figure S7. Flexible sensor folds 180 degrees.

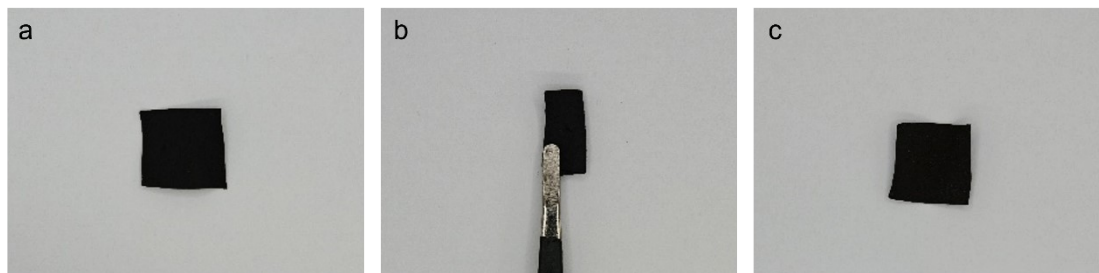

(a), before folding; (b) folding 180 degrees; (c) after folding.



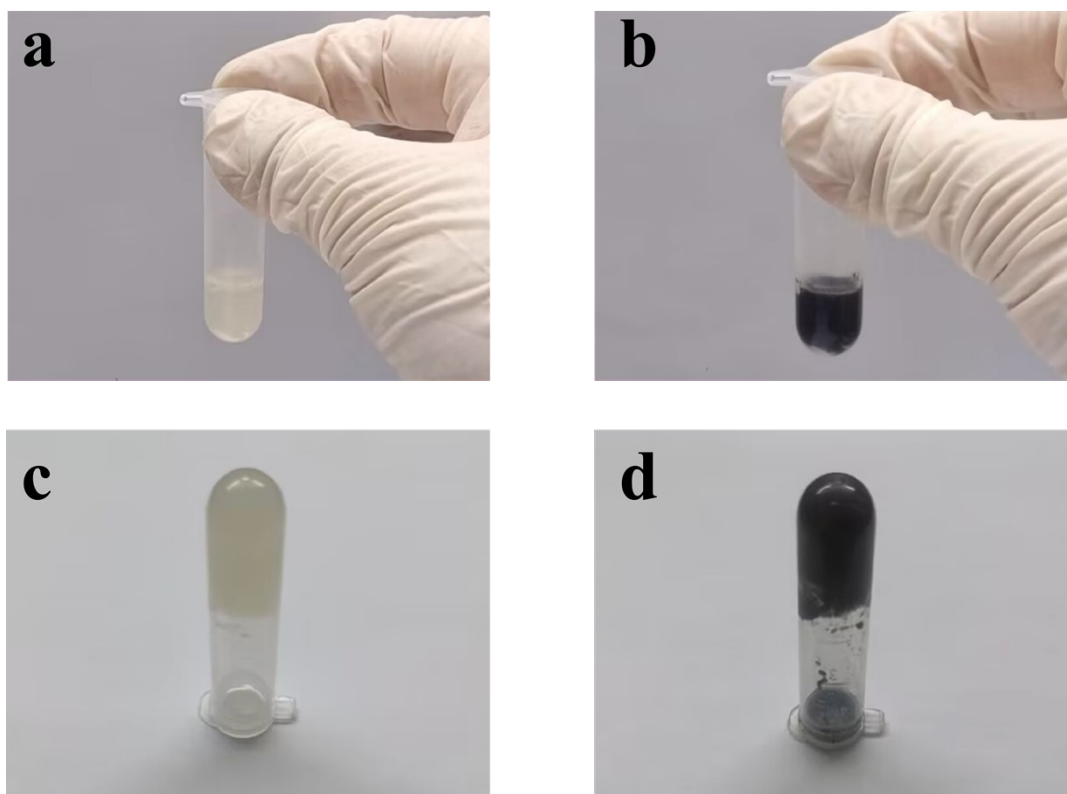

**Fig. S8.** (a) and (b) are the pre-fluid of SS-DHMC and SS-DHMC-AuNPs-AMWCNTs. (c) and (d) are the congealed SS-DHMC and SS-DHMC-AuNPs-AMWCNTs liquid after 24 hours.

Table S1. Comparative analysis of detection performance between SS-DHMC-AuNPs-AMWCNTs and other non-enzymatic glucose sensors

| Modified Electrodes            | LOD ( $\mu\text{M}$ ) | Sensitivity ( $\mu\text{A mM}^{-1} \text{cm}^{-2}$ ) | Linear range (mM) | Electrolyte | Real sample analysis                  | Ref.      | Interferences                          | Stable days |
|--------------------------------|-----------------------|------------------------------------------------------|-------------------|-------------|---------------------------------------|-----------|----------------------------------------|-------------|
| Co@Pt /C/GCE                   | 300                   | 2.26                                                 | 1.00–30.00        | 0.1 M PB    | Blood serum                           | [1]       | AAP,Fru,AA,UA,Cl <sup>-</sup>          | 30          |
| Pt/MXene/GCE                   | 29.15                 | 3.43                                                 | 0–8 mM            | 0.1 M PBS   | Human sweat                           | [2]       | UA, DA, LA, and AA                     | 11          |
| Chitosan/K-carrageenan         | 5                     | --                                                   | 0.01-7            | 0.1M PBS    | --                                    | [3]       | AA,UA,UR                               | 22          |
| Cu <sub>2</sub> O NPs@CSs/CSF  | 0.29                  | 426.6                                                | 0.001-2           | 0.1M NaOH   | Blood serum                           | [4]       | UA,AA,NaCl                             | 7           |
| AuNPs/PANI/CC                  | 3.08                  | 150                                                  | 0.0126-10         | 0.5M KOH    | --                                    | [5]       | D-galactose,AA, Fru, NaCl, KCl, UA,AMP | 15          |
| CeO <sub>2</sub> /Au           | 10                    | 44                                                   | 0.01-20           | 0.01M PBS   | --                                    | [6]       | -                                      | -           |
| GOx/(SiO <sub>2</sub> -PA)/GCE | 12                    | --                                                   | 0.16-8            | 0.01M PBS   | Bovine, mouse, rabbit and human blood | [7]       | UA,AA                                  | 30          |
| Gr/PANI/AuNPs/GOD              | 100                   | 378                                                  | 0.2-11.2          | 0.1M PBS    | Human blood                           | [8]       | DA,AA,UA                               | -           |
| Pd-Pt core-shell nanocubes     | 41.1                  | 170                                                  | 0.3~6.8           | 0.1 M NaOH  | Calf serum                            | [9]       | AA,UA,Fru,Suc,Mal,Sor                  | -           |
| Ag-NPs/PoPD/ITO                | 12                    | --                                                   | 0.15-13           | 0.1M PBS    | Human blood                           | [10]      | AA,UA                                  | 70          |
| SS-DHMC-AuNPs-AMWCNTs          | 4                     | 13.43 and 5                                          | 0.025-0.4         | 0.1M PBS    | Human sweat and blood                 | This work | AA,DA,KCl,NaCl,UA,UR,LA                | 30          |

Table. S2. The detection of glucose in human sweat samples.

| Sample | Add ( $\mu\text{M}$ ) | Detection ( $\mu\text{M}$ ) | Recovery | R.S.D<br>(N=3) |
|--------|-----------------------|-----------------------------|----------|----------------|
| 1      | 30.00                 | 24.86                       | 0.877    | 1.6%           |
| 2      | 50.00                 | 44.92                       | 0.898    | 2.6%           |
| 3      | 100.00                | 102.76                      | 1.028    | 1.3%           |

Table. S3. The detection of glucose in human blood samples.

| Sample | Blood glucose<br>concentration (mM) as<br>measured by glucometer | Blood glucose<br>concentration (mM)<br>as measured by film | Recovery | R.S.D<br>(N=3) |
|--------|------------------------------------------------------------------|------------------------------------------------------------|----------|----------------|
| 1(2H)  | 4.40                                                             | 4.08                                                       | 0.927    | 5.6%           |
| 1(4H)  | 3.37                                                             | 3.12                                                       | 0.926    | 2.8%           |
| 2(2H)  | 5.10                                                             | 4.75                                                       | 0.931    | 8.9%           |
| 2(4H)  | 4.47                                                             | 4.18                                                       | 0.935    | 3.8%           |
| 3(2H)  | 5.63                                                             | 5.89                                                       | 1.046    | 3.4%           |
| 3(4H)  | 3.90                                                             | 3.98                                                       | 1.021    | 1.9%           |

## References

- [1]. Mei H, Wu W, Yu B, Li Y, Wu H, Wang S, *et al.* 2024. Non-enzymatic sensing of glucose at neutral pH values using a glassy carbon electrode modified with carbon supported Co@Pt core-shell nanoparticles. *Microchimica Acta*. 182: 1869–1875, 10.1007/s00604-015-1524-6
- [2]. Li QF, Chen X, Wang H, Liu M, Peng HL. 2023. Pt/MXene-Based Flexible Wearable Non-Enzymatic Electrochemical Sensor for Continuous Glucose Detection in Sweat. *ACS Appl Mater Interfaces*. 15: 13290-13298, 10.1021/acsami.2c20543
- [3]. Rassas I, Braiek M, Bonhomme A, Bessueille F, Rafin G, Majdoub H, *et al.* 2019. Voltammetric glucose biosensor based on glucose oxidase encapsulation in a chitosan-kappa-carrageenan polyelectrolyte complex. *Mater Sci Eng C Mater Biol Appl*. 95: 152-159, 10.1016/j.msec.2018.10.078
- [4]. Lu W, Jian M, Wang Q, Xia K, Zhang M, Wang H, *et al.* 2019. Hollow core-sheath nanocarbon spheres grown on carbonized silk fabrics for self-supported and nonenzymatic glucose sensing. *Nanoscale*. 11: 11856-11863, 10.1039/c9nr01791g
- [5]. Xu M, Song Y, Ye Y, Gong C, Shen Y, Wang L, *et al.* 2017. A novel flexible electrochemical glucose sensor based on gold nanoparticles/polyaniline arrays/carbon cloth electrode. *Sensors and actuators B: Chemical*. 252: 1187-1193, 10.1016/j.snb.2017.07.147
- [6]. Gougis M, Tabet-Aoul A, Ma D, Mohamedi M. 2014. Nanostructured cerium oxide catalyst support: Effects of morphology on the electroactivity of gold toward oxidative sensing of glucose. *Microchimica Acta*. 181: 1207-1214, 10.1007/s00604-014-1283-9
- [7]. Zhao W, Ni Y, Zhu Q, Fu R, Huang X, Shen J. 2013. Innovative biocompatible nanospheres as biomimetic platform for electrochemical glucose biosensor. *Biosens Bioelectron*. 44: 1-5, 10.1016/j.bios.2012.12.036
- [8]. Kong FY, Gu SX, Li WW, Chen TT, Xu Q, Wang W. 2014. A paper disk equipped with graphene/polyaniline/Au nanoparticles/glucose oxidase biocomposite modified screen-printed electrode: toward whole blood glucose determination. *Biosens Bioelectron*. 56: 77-82, 10.1016/j.bios.2013.12.067
- [9]. Ye JS, Hong BD, Wu YS, Chen HR, Lee CL. 2016. Heterostructured palladium-platinum core-shell nanocubes for use in a nonenzymatic amperometric glucose sensor. *Microchimica Acta*. 183: 3311-3320, 10.1007/s00604-016-1976-3
- [10]. Wang J, Wang M, Guan J, Wang C, Wang G. 2017. Construction of a non-enzymatic sensor based on the poly(o-phenylenediamine)/Ag-NPs composites for detecting glucose in blood. *Mater Sci Eng C Mater Biol Appl*. 71: 844-851, 10.1016/j.msec.2016.10.080
